# Supplementary material for: Bioinformatic Analysis Reveals both Oversampled and Underexplored Biosynthetic Diversity in Nonribosomal Peptides
Source: PubMed Central journal article supplement — ACS Chem Biol. 2023 Feb 23;18(3):476–83. doi: 10.1021/acschembio.2c00761 (PMC10028606; doi:10.1021/acschembio.2c00761), 2023-02-23
Supplement: cb2c00761_si_001.pdf [file cb2c00761_si_001.pdf]

## **Bioinformatic analysis reveals both oversampled and underexplored biosynthetic diversity in nonribosomal peptides**

Bo-Siyuan Jian<sup>1</sup>, Shao-Lun Chiou<sup>2</sup>, Chun-Chia Hsu<sup>2</sup>, Josh Ho<sup>2</sup>, Yu-Wei Wu<sup>3,4,5\*</sup>, John Chu<sup>2\*</sup>

<sup>1</sup> Department of Computer Science and Information Engineering, National Taiwan University, Taipei 10617, Taiwan; <sup>2</sup> Department of Chemistry, National Taiwan University, Taipei 10617, Taiwan; <sup>3</sup> Graduate Institute of Biomedical Informatics, College of Medical Science and Technology, Taipei Medical University, Taipei 10675, Taiwan; <sup>4</sup> Clinical Big Data Research Center, Taipei Medical University Hospital, Taipei 10675, Taiwan; <sup>5</sup> TMU Research Center for Digestive Medicine, Taipei Medical University, Taipei 10675, Taiwan

\*Correspondence: [yuwei.wu@tmu.edu.tw](mailto:yuwei.wu@tmu.edu.tw) and [johnchu@ntu.edu.tw](mailto:johnchu@ntu.edu.tw)

### Clustering identity

Determining the clustering identity cutoff is key to rarefaction analysis. The nonribosomal code, sometimes referred to as the Stachelhaus code, is a compendium of 10 residues that constitute the A domain active site, which in turn dictates the substrate specificity of the A domain. We defined the “cleanliness” of clustering as the proportion of the most abundant predicted substrate BB within each cluster and found that 70% identity cutoff is suitable for the analysis at hand. Specifically, when the cutoff was set at 60, 70, 80, 90, and 100%, the resulting cleanliness were 99, 97, 89, 71, and 36%, respectively (**Figure S2**). Based on this result, we chose to set the clustering identity at 70%, which is in line with previous bioinformatic studies, as well as recent empirical observations (1-3). See the legend of **Figure S2** for further discussion.

### Categorizing nonribosomal peptide (NRP) building blocks (BB)

The list of all BB that appear in GenBank predictions, MIBiG database, and the SANDPUMA training set can be found in the *Building Blocks (BB) Groups* tab of **Table S1**; BB are arranged by group and their source (4, 5). GenBank predictions are arranged by bacterial phyla in a separate *GenBank Predictions* tab. Note that the  $\Omega$  parameter for the **benzoyl** group was calculated based on A domains associated with the SANDPUMA training set (5) as opposed to the MIBiG database; this is because the former has a larger sample size for this BB group than the latter. The  $\Omega$  parameter for all other BB groups were calculated using the formula described in the manuscript text.

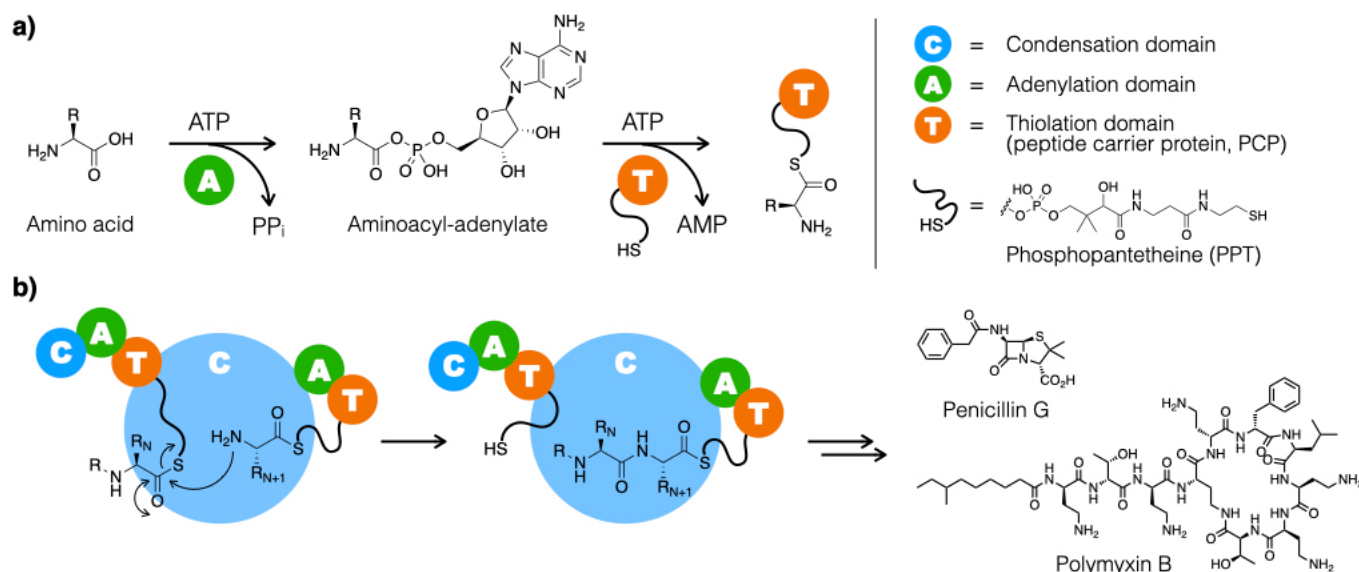

**Figure S1.** NRPS are peptides that are not biosynthesized by the ribosome; they are instead constructed via an enzymatic assembly line. Each module in the assembly line is responsible for incorporating a building block (BB), in most cases an amino acid (AA), into the NRPS backbone. A module typically contains multiple semi-autonomously folded domains, each with its own function, including most commonly the condensation (C), adenylation (A), and thiolation (T) domains. The A domain is an enzyme that catalyzes the activation of a substrate BB to form an aminoacyl-adenylate, which is then attached via a thioester bond onto the phosphopantetheine arm of the T domain. Peptide bond formation between BB on neighboring T domains is catalyzed by the C domain in between, wherein the amino group of the BB on the NRPS intermediate attacks the activated BB on its *N*-terminal side. This reaction extends the peptide intermediate by one residue and effectively moves it down the assembly line from the *N*<sup>th</sup> to the *N*+1<sup>th</sup> module. The resulting NRPS is colinear to the biosynthetic gene sequences due to such an arrangement.

Setting a high clustering identity cutoff (being too stringent) means that A domains must have nearly identical nonribosomal codes to be placed in the same group. Being too lax has the opposite effect and is not desirable either. Cleanliness, a parameter often used to determine the suitable balance between the two extremes, is defined as the proportion of the most frequently appeared items in a cluster. “Items” are the NRP building blocks in this case. The goal is to identify a clustering identity cutoff with a small number of clusters and a high mean cleanliness.

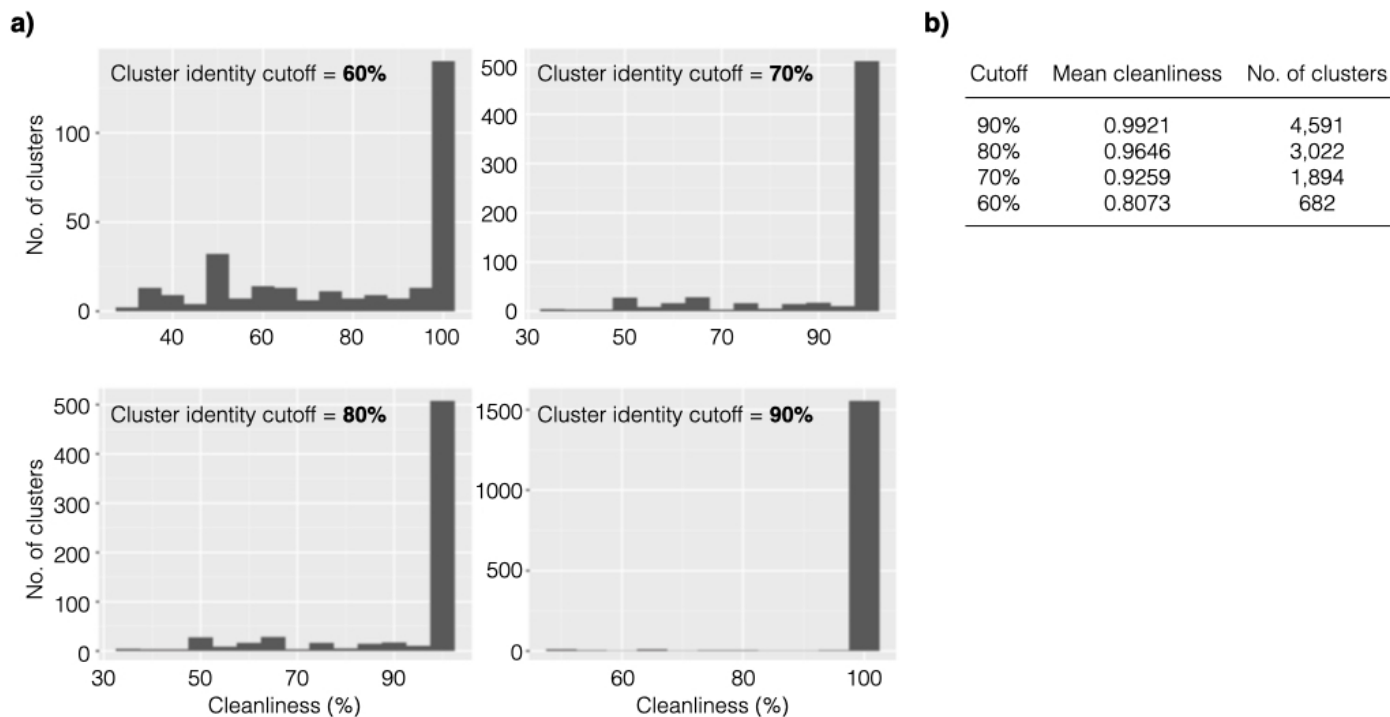

**Figure S2. a)** To determine a suitable clustering identity cutoff, we plotted cleanliness histograms at various cutoffs (90%, 80%, 70%, and 60%). **b)** The mean cleanliness at each threshold was then calculated. We decided to set the clustering identity cutoff as we saw a large drop in both cleanliness and the number of clusters from 70% to 60%.

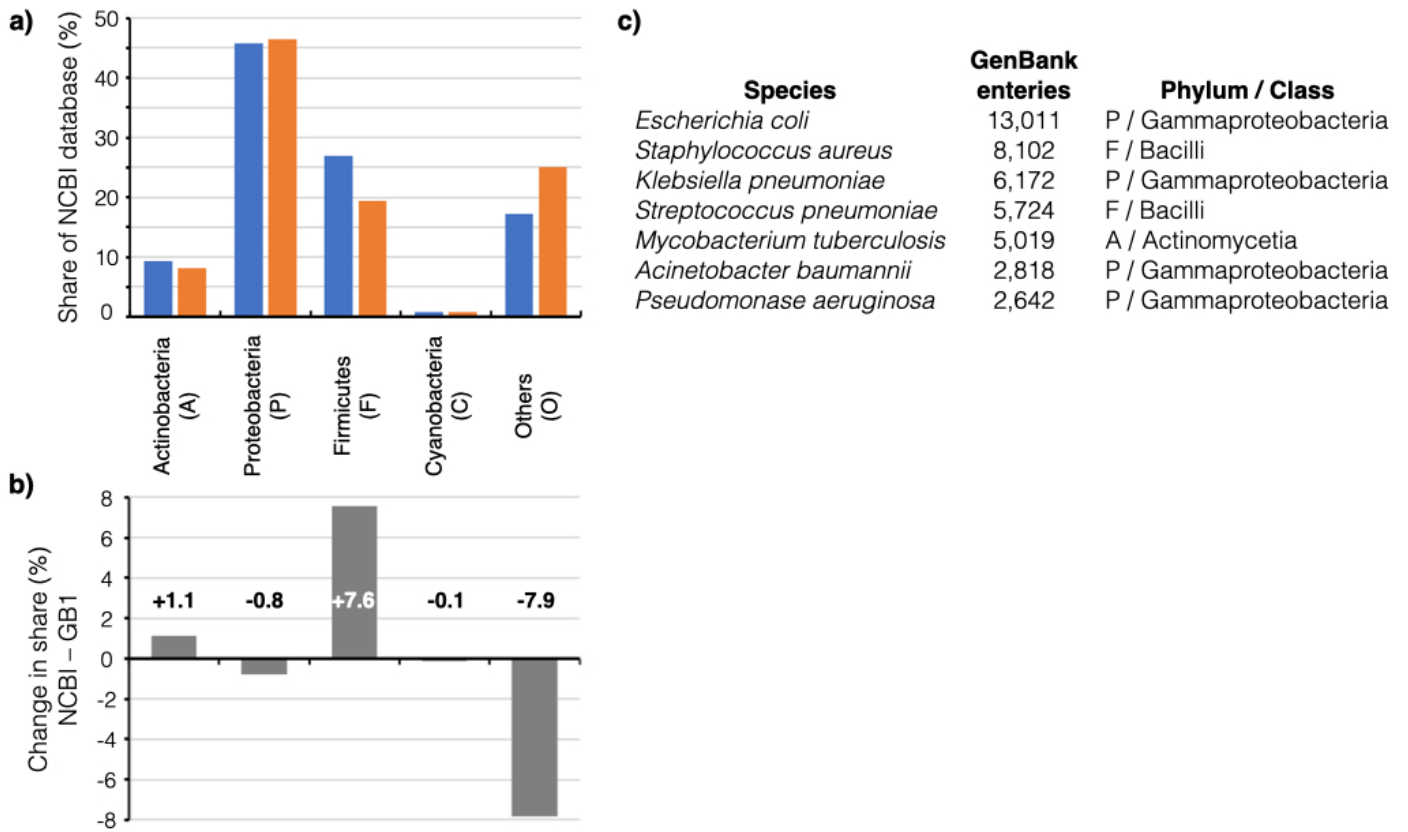

**Figure S3. a)** A comparison of the composition at the phylum level of NCBI (GenBank) and GB1. **b)** Changes in phylogenetic composition going from NCBI (GenBank) to GB1. **c)** Species causing the biggest skews are listed.

## References

1. T. Stachelhaus, H. D. Mootz, M. A. Marahiel, The specificity-conferring code of adenylation domains in nonribosomal peptide synthetases. *Chem. Biol.* **6**, 493-505 (1999).
2. C. Rausch, T. Weber, O. Kohlbacher, W. Wohlleben, D. H. Huson, Specificity prediction of adenylation domains in nonribosomal peptide synthetases (NRPS) using transductive support vector machines (TSVMs). *Nucleic Acids Res.* **33**, 5799-5808 (2005).
3. Z. W. Wei *et al.*, Free Piperazic Acid as a Precursor to Nonribosomal Peptides. *J. Am. Chem. Soc.* **144**, 13556-13564 (2022).
4. S. A. Kautsar *et al.*, MIBiG 2.0: a repository for biosynthetic gene clusters of known function. *Nucleic Acids Res.* **48**, D454-D458 (2020).
5. M. G. Chevrette, F. Aicheler, O. Kohlbacher, C. R. Currie, M. H. Medema, SANDPUMA: ensemble predictions of nonribosomal peptide chemistry reveal biosynthetic diversity across Actinobacteria. *Bioinformatics* **33**, 3202-3210 (2017).
